# Supplementary material for: Plasma lipidomics of primary biliary cholangitis and its comparison with Sjögren’s syndrome
Source: Front Immunol. 2023 May 5;14:1124443. doi: 10.3389/fimmu.2023.1124443 (PMC10196160; doi:10.3389/fimmu.2023.1124443)
Supplement: Supplementary file 8 [file Table_3.xlsx]

## Sheet: ALP
Lipids	ALP Correlation Coefficient	P-value
Cer(d18:1/18:0)	0.522	1.9e-05
Cer(d18:0/24:1)	0.517	2.4e-05
Cer(d18:1/24:1)	0.341	0.008
ChE(20:3)	0.156	0.234
ChE(22:5n6)	0.103	0.434
DG(16:0/18:1)	0.35	0.006
DG(16:0/18:2)	0.25	0.054
DG(16:1/18:1)	0.423	0.001
DG(16:1/18:2)	0.253	0.051
DG(16:0/20:4)	0.38	0.003
DG(20:1/18:1)	0.135	0.304
DG(18:0/20:3)1	0.245	0.059
DG(18:0/20:4)	0.194	0.137
DG(18:1/20:3)	0.323	0.012
DG(18:1/20:4)	0.325	0.011
DG(18:3/20:2)	0.25	0.054
DG(16:0/22:6)	0.08	0.541
DG(18:1/22:5)	0.159	0.225
PC(14:0/14:0)	0.484	9e-05
PC(16:0/14:0)	0.589	7.4802e-07
PC(16:1/14:0)	0.546	7e-06
PC(17:1/14:0)	0.577	1e-06
PC(16:0/16:0)	0.633	5.5602e-08
PC(16:0e/16:0)	0.534	1.1e-05
PC(16:0/16:1)	0.591	6.5343e-07
PC(14:0/18:2)	0.474	0.000133
PC(14:0/18:3)	0.449	0.000316
PC(15:0/18:1)	0.552	5e-06
PC(18:0/16:0)	0.414	0.001
PC(16:0/18:1)	0.629	7.5146e-08
PC(18:1e/16:0)	0.502	4.4e-05
PC(16:0/18:3)+PC(16:1/18:2)	0.393	0.002
PC(16:1/18:3)+PC(14:0/20:4)	0.338	0.008
PC(17:1/18:3)	0.288	0.026
PC(18:0/18:1)	0.455	0.000258
PC(18:1/18:1)	0.522	1.9e-05
PC(16:0/20:3)+PC(18:0/18:3)	0.507	3.6e-05
PC(18:1/18:2)	0.429	0.001
PC(18:2/18:2)	0.332	0.01
PC(16:1/20:4)	0.475	0.000128
PC(18:2/18:3)	0.238	0.067
PC(18:3/18:3)	0.288	0.026
PC(37:3)	0.246	0.058
PC(18:0/20:2)mixture	0.47	0.000152
PC(18:0/20:3)	0.376	0.003
PC(18:1/20:2)	0.384	0.002
PC(16:0/22:4)	0.43	0.001
PC(16:0e/22:4)	0.406	0.001
PC(18:2/20:4)	0.314	0.014
PC(18:0/22:4)	0.238	0.067
PC(42:2)	0.46	0.000218
PC(20:0/22:5)	0.368	0.004
PC(20:1/22:5)	0.298	0.021
PC(42:7)	0.29	0.025
PC(22:5/22:6)	0.113	0.389
PE(16:0/18:1)	0.387	0.002
PE(16:0/18:2)	0.307	0.017
PE(18:0/18:1)	0.248	0.057
PE(18:0/18:2)	0.186	0.156
PE(18:1/18:1)	0.237	0.068
PE(18:1/18:2)	0.26	0.045
PE(16:0/20:4)	0.153	0.242
PE(18:1/18:3)+PE(18:2/18:2)	0.02	0.877
PE(16:1/20:4)	0.194	0.137
PE(18:0/20:3)	0.36	0.005
PE(18:0/20:5)	0.274	0.034
PE(40:4)	0.318	0.013
PE(18:0/22:5)	0.372	0.003
PE(18:1/22:4)	-0.134	0.308
PE(18:1/22:6)	0.227	0.081
PI(16:0/18:1)	0.261	0.044
PI(16:0/18:2)	0.306	0.017
PI(16:0/20:3)	0.276	0.032
PI(18:1/18:2)	0.232	0.075
PI(18:1/20:4)	0.21	0.107
PI(16:0/22:6)	0.383	0.003
GlcCer(d18:1/24:1)	0.366	0.004
LysoPC(14:0)	0.417	0.001
LysoPC(16:1)	0.589	7.3141e-07
LysoPC(18:3)	0.208	0.111
SM(d40:3)	0.358	0.005
TG(16:0/14:0/16:0)	0.25	0.054
TG(16:0/14:0/16:1)	0.278	0.031
TG(14:0/14:0/18:2)+TG(16:1/14:0/16:1)	0.29	0.025
TG(10:0/18:1/18:2)	0.267	0.039
TG(16:0/16:0/16:0)	0.285	0.027
TG(16:0/14:0/18:1)	0.298	0.021
TG(16:1/14:0/18:1)+TG(16:0/14:0/18:2)	0.273	0.035
TG(16:0/14:0/18:3)	0.216	0.097
TG(16:1/14:0/18:2)	0.246	0.058
TG(12:0/18:1/18:3)+TG(12:0/18:2/18:2)	0.157	0.23
TG(12:0/18:2/18:3)	0.171	0.192
TG(18:0/16:0/16:0)	0.194	0.138
TG(16:0/16:0/18:1)	0.33	0.01
TG(16:0/16:0/18:2)	0.291	0.024
TG(16:0/16:1/18:1)	0.32	0.013
TG(16:0/16:0/18:3)	0.277	0.032
TG(16:1/16:1/18:1)	0.202	0.121
TG(16:0/16:1/18:3)+TG(18:2/14:0/18:2)	0.133	0.311
TG(14:0/18:2/18:3)mixture	0.13	0.321
TG(18:3/14:0/18:3)mixture	0.117	0.373
TG(18:0/16:0/18:1)	0.185	0.158
TG(16:0/16:0/20:4)	0.241	0.063
TG(16:0/16:0/20:5)	0.186	0.154
TG(16:0/18:3/18:3)	0.073	0.582
TG(16:0/18:1/20:4)	0.265	0.041
TG(16:0/18:2/20:4)	0.125	0.34
TG(18:0/18:1/20:3)	0.325	0.011
TG(18:1/18:1/20:3)	0.291	0.024
TG(22:1/18:2/18:2)+TG(18:0/18:1/22:4)	0.378	0.003
TG(18:1/18:1/22:4)+TG(18:0/18:1/22:5)	0.299	0.02
TG(18:1/18:1/22:5)mixture	0.2	0.126
TG(24:1/18:2/18:2)	0.332	0.01
TG(22:4/18:2/22:4)	0.243	0.061
TG(24:1/18:2/20:4)	0.414	0.001

## Sheet: GGT
Lipids	GGT Correlation Coefficient	P-value
Cer(d18:1/18:0)	0.599	4.275e-07
Cer(d18:0/24:1)	0.428	0.001
Cer(d18:1/24:1)	0.276	0.033
ChE(20:3)	0.119	0.366
ChE(22:5n6)	0.074	0.572
DG(16:0/18:1)	0.217	0.095
DG(16:0/18:2)	0.276	0.033
DG(16:1/18:1)	0.203	0.12
DG(16:1/18:2)	0.212	0.103
DG(16:0/20:4)	0.341	0.008
DG(20:1/18:1)	0.143	0.275
DG(18:0/20:3)1	0.219	0.093
DG(18:0/20:4)	0.276	0.033
DG(18:1/20:3)	0.338	0.008
DG(18:1/20:4)	0.359	0.005
DG(18:3/20:2)	0.284	0.028
DG(16:0/22:6)	0.204	0.118
DG(18:1/22:5)	0.225	0.083
PC(14:0/14:0)	0.258	0.046
PC(16:0/14:0)	0.37	0.004
PC(16:1/14:0)	0.3	0.02
PC(17:1/14:0)	0.327	0.011
PC(16:0/16:0)	0.453	0.000278
PC(16:0e/16:0)	0.344	0.007
PC(16:0/16:1)	0.367	0.004
PC(14:0/18:2)	0.296	0.022
PC(14:0/18:3)	0.263	0.043
PC(15:0/18:1)	0.321	0.013
PC(18:0/16:0)	0.331	0.01
PC(16:0/18:1)	0.445	0.000369
PC(18:1e/16:0)	0.315	0.014
PC(16:0/18:3)+PC(16:1/18:2)	0.27	0.037
PC(16:1/18:3)+PC(14:0/20:4)	0.23	0.077
PC(17:1/18:3)	0.191	0.144
PC(18:0/18:1)	0.354	0.006
PC(18:1/18:1)	0.268	0.038
PC(16:0/20:3)+PC(18:0/18:3)	0.347	0.007
PC(18:1/18:2)	0.189	0.148
PC(18:2/18:2)	0.23	0.077
PC(16:1/20:4)	0.345	0.007
PC(18:2/18:3)	0.109	0.409
PC(18:3/18:3)	0.186	0.154
PC(37:3)	0.167	0.203
PC(18:0/20:2)mixture	0.354	0.005
PC(18:0/20:3)	0.355	0.005
PC(18:1/20:2)	0.361	0.005
PC(16:0/22:4)	0.335	0.009
PC(16:0e/22:4)	0.351	0.006
PC(18:2/20:4)	0.262	0.043
PC(18:0/22:4)	0.274	0.034
PC(42:2)	0.295	0.022
PC(20:0/22:5)	0.237	0.068
PC(20:1/22:5)	0.232	0.074
PC(42:7)	0.103	0.433
PC(22:5/22:6)	-0.125	0.34
PE(16:0/18:1)	0.204	0.118
PE(16:0/18:2)	0.16	0.222
PE(18:0/18:1)	0.08	0.546
PE(18:0/18:2)	0.094	0.474
PE(18:1/18:1)	0.077	0.558
PE(18:1/18:2)	0.04	0.764
PE(16:0/20:4)	0.035	0.789
PE(18:1/18:3)+PE(18:2/18:2)	-0.085	0.518
PE(16:1/20:4)	0.051	0.696
PE(18:0/20:3)	0.277	0.032
PE(18:0/20:5)	0.147	0.264
PE(40:4)	0.334	0.009
PE(18:0/22:5)	0.335	0.009
PE(18:1/22:4)	-0.075	0.568
PE(18:1/22:6)	0.09	0.492
PI(16:0/18:1)	0.03	0.818
PI(16:0/18:2)	0.13	0.323
PI(16:0/20:3)	0.113	0.391
PI(18:1/18:2)	0.023	0.863
PI(18:1/20:4)	0.041	0.758
PI(16:0/22:6)	0.129	0.327
GlcCer(d18:1/24:1)	0.212	0.103
LysoPC(14:0)	0.295	0.022
LysoPC(16:1)	0.463	0.000197
LysoPC(18:3)	0.183	0.161
SM(d40:3)	0.179	0.17
TG(16:0/14:0/16:0)	0.094	0.477
TG(16:0/14:0/16:1)	0.11	0.402
TG(14:0/14:0/18:2)+TG(16:1/14:0/16:1)	0.164	0.211
TG(10:0/18:1/18:2)	0.128	0.331
TG(16:0/16:0/16:0)	0.147	0.262
TG(16:0/14:0/18:1)	0.134	0.308
TG(16:1/14:0/18:1)+TG(16:0/14:0/18:2)	0.134	0.308
TG(16:0/14:0/18:3)	0.119	0.367
TG(16:1/14:0/18:2)	0.138	0.293
TG(12:0/18:1/18:3)+TG(12:0/18:2/18:2)	0.125	0.343
TG(12:0/18:2/18:3)	0.132	0.316
TG(18:0/16:0/16:0)	0.134	0.309
TG(16:0/16:0/18:1)	0.214	0.1
TG(16:0/16:0/18:2)	0.251	0.053
TG(16:0/16:1/18:1)	0.098	0.457
TG(16:0/16:0/18:3)	0.204	0.118
TG(16:1/16:1/18:1)	0.146	0.266
TG(16:0/16:1/18:3)+TG(18:2/14:0/18:2)	0.123	0.351
TG(14:0/18:2/18:3)mixture	0.104	0.43
TG(18:3/14:0/18:3)mixture	0.103	0.432
TG(18:0/16:0/18:1)	0.154	0.241
TG(16:0/16:0/20:4)	0.215	0.099
TG(16:0/16:0/20:5)	0.136	0.299
TG(16:0/18:3/18:3)	0.09	0.496
TG(16:0/18:1/20:4)	0.275	0.034
TG(16:0/18:2/20:4)	0.17	0.195
TG(18:0/18:1/20:3)	0.279	0.031
TG(18:1/18:1/20:3)	0.307	0.017
TG(22:1/18:2/18:2)+TG(18:0/18:1/22:4)	0.361	0.005
TG(18:1/18:1/22:4)+TG(18:0/18:1/22:5)	0.309	0.016
TG(18:1/18:1/22:5)mixture	0.199	0.127
TG(24:1/18:2/18:2)	0.307	0.017
TG(22:4/18:2/22:4)	0.222	0.089
TG(24:1/18:2/20:4)	0.325	0.011

## Sheet: TBIL
Lipids	TBIL Correlation Coefficient	P-value
Cer(d18:1/18:0)	0.168	0.2
Cer(d18:0/24:1)	0.393	0.002
Cer(d18:1/24:1)	0.175	0.18
ChE(20:3)	-0.142	0.278
ChE(22:5n6)	-0.068	0.603
DG(16:0/18:1)	0.071	0.589
DG(16:0/18:2)	0.041	0.756
DG(16:1/18:1)	0.188	0.151
DG(16:1/18:2)	0.026	0.844
DG(16:0/20:4)	0.115	0.381
DG(20:1/18:1)	0.14	0.285
DG(18:0/20:3)1	0.094	0.476
DG(18:0/20:4)	-0.014	0.913
DG(18:1/20:3)	0.075	0.569
DG(18:1/20:4)	0.154	0.239
DG(18:3/20:2)	0.051	0.699
DG(16:0/22:6)	-0.029	0.826
DG(18:1/22:5)	0.065	0.623
PC(14:0/14:0)	0.206	0.114
PC(16:0/14:0)	0.336	0.009
PC(16:1/14:0)	0.326	0.011
PC(17:1/14:0)	0.329	0.01
PC(16:0/16:0)	0.537	1e-05
PC(16:0e/16:0)	0.421	0.001
PC(16:0/16:1)	0.381	0.003
PC(14:0/18:2)	0.205	0.117
PC(14:0/18:3)	0.169	0.196
PC(15:0/18:1)	0.333	0.009
PC(18:0/16:0)	0.263	0.042
PC(16:0/18:1)	0.412	0.001
PC(18:1e/16:0)	0.487	8e-05
PC(16:0/18:3)+PC(16:1/18:2)	0.211	0.105
PC(16:1/18:3)+PC(14:0/20:4)	-0.002	0.99
PC(17:1/18:3)	0.111	0.399
PC(18:0/18:1)	0.23	0.077
PC(18:1/18:1)	0.474	0.000132
PC(16:0/20:3)+PC(18:0/18:3)	0.209	0.109
PC(18:1/18:2)	0.399	0.002
PC(18:2/18:2)	0.162	0.217
PC(16:1/20:4)	0.198	0.129
PC(18:2/18:3)	0.193	0.14
PC(18:3/18:3)	0.025	0.849
PC(37:3)	0.107	0.415
PC(18:0/20:2)mixture	0.171	0.191
PC(18:0/20:3)	0.087	0.509
PC(18:1/20:2)	0.078	0.556
PC(16:0/22:4)	0.139	0.289
PC(16:0e/22:4)	0.299	0.02
PC(18:2/20:4)	0.068	0.608
PC(18:0/22:4)	0.007	0.958
PC(42:2)	0.51	3.1e-05
PC(20:0/22:5)	0.333	0.009
PC(20:1/22:5)	0.177	0.176
PC(42:7)	0.331	0.01
PC(22:5/22:6)	0.102	0.439
PE(16:0/18:1)	0.243	0.061
PE(16:0/18:2)	0.195	0.136
PE(18:0/18:1)	0.212	0.104
PE(18:0/18:2)	0.119	0.365
PE(18:1/18:1)	0.367	0.004
PE(18:1/18:2)	0.291	0.024
PE(16:0/20:4)	0.128	0.33
PE(18:1/18:3)+PE(18:2/18:2)	0.042	0.748
PE(16:1/20:4)	0.055	0.675
PE(18:0/20:3)	0.136	0.302
PE(18:0/20:5)	0.179	0.172
PE(40:4)	0.118	0.369
PE(18:0/22:5)	0.08	0.542
PE(18:1/22:4)	-0.13	0.324
PE(18:1/22:6)	0.245	0.059
PI(16:0/18:1)	0.124	0.345
PI(16:0/18:2)	0.111	0.397
PI(16:0/20:3)	0.089	0.501
PI(18:1/18:2)	0.215	0.099
PI(18:1/20:4)	0.098	0.456
PI(16:0/22:6)	0.186	0.155
GlcCer(d18:1/24:1)	0.383	0.003
LysoPC(14:0)	-0.033	0.804
LysoPC(16:1)	0.26	0.045
LysoPC(18:3)	-0.005	0.97
SM(d40:3)	0.285	0.027
TG(16:0/14:0/16:0)	-0.035	0.789
TG(16:0/14:0/16:1)	-0.031	0.817
TG(14:0/14:0/18:2)+TG(16:1/14:0/16:1)	-0.021	0.875
TG(10:0/18:1/18:2)	-0.009	0.949
TG(16:0/16:0/16:0)	-0.053	0.689
TG(16:0/14:0/18:1)	0.013	0.924
TG(16:1/14:0/18:1)+TG(16:0/14:0/18:2)	0.002	0.985
TG(16:0/14:0/18:3)	-0.056	0.672
TG(16:1/14:0/18:2)	0.012	0.926
TG(12:0/18:1/18:3)+TG(12:0/18:2/18:2)	-0.046	0.726
TG(12:0/18:2/18:3)	-0.001	0.997
TG(18:0/16:0/16:0)	-0.086	0.516
TG(16:0/16:0/18:1)	0.064	0.627
TG(16:0/16:0/18:2)	0.002	0.986
TG(16:0/16:1/18:1)	0.085	0.521
TG(16:0/16:0/18:3)	-0.009	0.943
TG(16:1/16:1/18:1)	0.008	0.954
TG(16:0/16:1/18:3)+TG(18:2/14:0/18:2)	-0.025	0.849
TG(14:0/18:2/18:3)mixture	0.003	0.981
TG(18:3/14:0/18:3)mixture	-0.003	0.982
TG(18:0/16:0/18:1)	-0.074	0.572
TG(16:0/16:0/20:4)	-0.014	0.914
TG(16:0/16:0/20:5)	-0.069	0.601
TG(16:0/18:3/18:3)	-0.047	0.723
TG(16:0/18:1/20:4)	0.063	0.634
TG(16:0/18:2/20:4)	-0.028	0.835
TG(18:0/18:1/20:3)	0.11	0.403
TG(18:1/18:1/20:3)	0.065	0.624
TG(22:1/18:2/18:2)+TG(18:0/18:1/22:4)	0.266	0.04
TG(18:1/18:1/22:4)+TG(18:0/18:1/22:5)	0.197	0.131
TG(18:1/18:1/22:5)mixture	0.163	0.212
TG(24:1/18:2/18:2)	0.351	0.006
TG(22:4/18:2/22:4)	0.234	0.072
TG(24:1/18:2/20:4)	0.421	0.001

## Sheet: AST
Lipids	AST Correlation Coefficient	P-value
Cer(d18:1/18:0)	0.579	1e-06
Cer(d18:0/24:1)	0.477	0.000117
Cer(d18:1/24:1)	0.319	0.013
ChE(20:3)	0.022	0.87
ChE(22:5n6)	-0.03	0.821
DG(16:0/18:1)	0.229	0.078
DG(16:0/18:2)	0.24	0.064
DG(16:1/18:1)	0.248	0.056
DG(16:1/18:2)	0.177	0.176
DG(16:0/20:4)	0.259	0.045
DG(20:1/18:1)	0.112	0.393
DG(18:0/20:3)1	0.175	0.181
DG(18:0/20:4)	0.149	0.256
DG(18:1/20:3)	0.245	0.059
DG(18:1/20:4)	0.251	0.053
DG(18:3/20:2)	0.181	0.166
DG(16:0/22:6)	0.073	0.581
DG(18:1/22:5)	0.141	0.281
PC(14:0/14:0)	0.335	0.009
PC(16:0/14:0)	0.473	0.000135
PC(16:1/14:0)	0.406	0.001
PC(17:1/14:0)	0.454	0.000269
PC(16:0/16:0)	0.558	4e-06
PC(16:0e/16:0)	0.488	7.7e-05
PC(16:0/16:1)	0.463	0.000193
PC(14:0/18:2)	0.353	0.006
PC(14:0/18:3)	0.311	0.016
PC(15:0/18:1)	0.416	0.001
PC(18:0/16:0)	0.393	0.002
PC(16:0/18:1)	0.444	0.000383
PC(18:1e/16:0)	0.459	0.000226
PC(16:0/18:3)+PC(16:1/18:2)	0.269	0.037
PC(16:1/18:3)+PC(14:0/20:4)	0.204	0.119
PC(17:1/18:3)	0.183	0.162
PC(18:0/18:1)	0.354	0.006
PC(18:1/18:1)	0.388	0.002
PC(16:0/20:3)+PC(18:0/18:3)	0.332	0.01
PC(18:1/18:2)	0.351	0.006
PC(18:2/18:2)	0.328	0.011
PC(16:1/20:4)	0.358	0.005
PC(18:2/18:3)	0.2	0.125
PC(18:3/18:3)	0.154	0.24
PC(37:3)	0.174	0.183
PC(18:0/20:2)mixture	0.374	0.003
PC(18:0/20:3)	0.258	0.047
PC(18:1/20:2)	0.26	0.045
PC(16:0/22:4)	0.273	0.035
PC(16:0e/22:4)	0.394	0.002
PC(18:2/20:4)	0.246	0.058
PC(18:0/22:4)	0.121	0.356
PC(42:2)	0.393	0.002
PC(20:0/22:5)	0.229	0.078
PC(20:1/22:5)	0.127	0.335
PC(42:7)	0.139	0.289
PC(22:5/22:6)	0.026	0.846
PE(16:0/18:1)	0.252	0.052
PE(16:0/18:2)	0.204	0.119
PE(18:0/18:1)	0.141	0.284
PE(18:0/18:2)	0.136	0.3
PE(18:1/18:1)	0.19	0.147
PE(18:1/18:2)	0.164	0.21
PE(16:0/20:4)	0.062	0.637
PE(18:1/18:3)+PE(18:2/18:2)	0.043	0.746
PE(16:1/20:4)	0.069	0.599
PE(18:0/20:3)	0.312	0.015
PE(18:0/20:5)	0.189	0.149
PE(40:4)	0.291	0.024
PE(18:0/22:5)	0.292	0.024
PE(18:1/22:4)	-0.086	0.514
PE(18:1/22:6)	0.151	0.251
PI(16:0/18:1)	0.064	0.626
PI(16:0/18:2)	0.137	0.295
PI(16:0/20:3)	0.122	0.353
PI(18:1/18:2)	0.17	0.194
PI(18:1/20:4)	0.097	0.46
PI(16:0/22:6)	0.163	0.212
GlcCer(d18:1/24:1)	0.34	0.008
LysoPC(14:0)	0.34	0.008
LysoPC(16:1)	0.536	1e-05
LysoPC(18:3)	0.207	0.112
SM(d40:3)	0.257	0.048
TG(16:0/14:0/16:0)	0.149	0.256
TG(16:0/14:0/16:1)	0.17	0.193
TG(14:0/14:0/18:2)+TG(16:1/14:0/16:1)	0.187	0.153
TG(10:0/18:1/18:2)	0.155	0.238
TG(16:0/16:0/16:0)	0.173	0.185
TG(16:0/14:0/18:1)	0.172	0.189
TG(16:1/14:0/18:1)+TG(16:0/14:0/18:2)	0.164	0.211
TG(16:0/14:0/18:3)	0.134	0.308
TG(16:1/14:0/18:2)	0.163	0.214
TG(12:0/18:1/18:3)+TG(12:0/18:2/18:2)	0.125	0.341
TG(12:0/18:2/18:3)	0.111	0.397
TG(18:0/16:0/16:0)	0.113	0.39
TG(16:0/16:0/18:1)	0.241	0.063
TG(16:0/16:0/18:2)	0.247	0.057
TG(16:0/16:1/18:1)	0.134	0.308
TG(16:0/16:0/18:3)	0.204	0.118
TG(16:1/16:1/18:1)	0.143	0.277
TG(16:0/16:1/18:3)+TG(18:2/14:0/18:2)	0.102	0.439
TG(14:0/18:2/18:3)mixture	0.088	0.504
TG(18:3/14:0/18:3)mixture	0.078	0.555
TG(18:0/16:0/18:1)	0.101	0.443
TG(16:0/16:0/20:4)	0.161	0.22
TG(16:0/16:0/20:5)	0.116	0.376
TG(16:0/18:3/18:3)	0.04	0.763
TG(16:0/18:1/20:4)	0.19	0.145
TG(16:0/18:2/20:4)	0.081	0.539
TG(18:0/18:1/20:3)	0.246	0.058
TG(18:1/18:1/20:3)	0.202	0.122
TG(22:1/18:2/18:2)+TG(18:0/18:1/22:4)	0.29	0.025
TG(18:1/18:1/22:4)+TG(18:0/18:1/22:5)	0.221	0.09
TG(18:1/18:1/22:5)mixture	0.099	0.451
TG(24:1/18:2/18:2)	0.225	0.084
TG(22:4/18:2/22:4)	0.167	0.202
TG(24:1/18:2/20:4)	0.31	0.016

## Sheet: TBA
Lipids	TBA Correlation Coefficient	P-value
Cer(d18:1/18:0)	0.27	0.037
Cer(d18:0/24:1)	0.489	7.5e-05
Cer(d18:1/24:1)	0.295	0.022
ChE(20:3)	-0.063	0.635
ChE(22:5n6)	0.087	0.508
DG(16:0/18:1)	0.326	0.011
DG(16:0/18:2)	0.122	0.353
DG(16:1/18:1)	0.361	0.005
DG(16:1/18:2)	0.097	0.463
DG(16:0/20:4)	0.196	0.133
DG(20:1/18:1)	0.268	0.038
DG(18:0/20:3)1	0.248	0.056
DG(18:0/20:4)	0.054	0.68
DG(18:1/20:3)	0.185	0.157
DG(18:1/20:4)	0.112	0.396
DG(18:3/20:2)	0.091	0.49
DG(16:0/22:6)	-0.15	0.254
DG(18:1/22:5)	-0.005	0.972
PC(14:0/14:0)	0.386	0.002
PC(16:0/14:0)	0.496	5.5e-05
PC(16:1/14:0)	0.483	9.3e-05
PC(17:1/14:0)	0.482	9.8e-05
PC(16:0/16:0)	0.613	1.9112e-07
PC(16:0e/16:0)	0.472	0.00014
PC(16:0/16:1)	0.519	2.1e-05
PC(14:0/18:2)	0.368	0.004
PC(14:0/18:3)	0.319	0.013
PC(15:0/18:1)	0.468	0.000164
PC(18:0/16:0)	0.366	0.004
PC(16:0/18:1)	0.572	2e-06
PC(18:1e/16:0)	0.539	9e-06
PC(16:0/18:3)+PC(16:1/18:2)	0.241	0.064
PC(16:1/18:3)+PC(14:0/20:4)	0.144	0.273
PC(17:1/18:3)	0.213	0.102
PC(18:0/18:1)	0.415	0.001
PC(18:1/18:1)	0.613	1.9112e-07
PC(16:0/20:3)+PC(18:0/18:3)	0.386	0.002
PC(18:1/18:2)	0.583	1e-06
PC(18:2/18:2)	0.399	0.002
PC(16:1/20:4)	0.362	0.004
PC(18:2/18:3)	0.319	0.013
PC(18:3/18:3)	0.064	0.629
PC(37:3)	0.186	0.156
PC(18:0/20:2)mixture	0.398	0.002
PC(18:0/20:3)	0.215	0.099
PC(18:1/20:2)	0.219	0.092
PC(16:0/22:4)	0.351	0.006
PC(16:0e/22:4)	0.4	0.002
PC(18:2/20:4)	0.226	0.083
PC(18:0/22:4)	0.199	0.127
PC(42:2)	0.508	3.4e-05
PC(20:0/22:5)	0.378	0.003
PC(20:1/22:5)	0.201	0.124
PC(42:7)	0.297	0.021
PC(22:5/22:6)	0.401	0.002
PE(16:0/18:1)	0.498	5.3e-05
PE(16:0/18:2)	0.393	0.002
PE(18:0/18:1)	0.513	2.7e-05
PE(18:0/18:2)	0.323	0.012
PE(18:1/18:1)	0.611	2.218e-07
PE(18:1/18:2)	0.518	2.3e-05
PE(16:0/20:4)	0.218	0.095
PE(18:1/18:3)+PE(18:2/18:2)	0.387	0.002
PE(16:1/20:4)	0.06	0.646
PE(18:0/20:3)	0.301	0.019
PE(18:0/20:5)	0.332	0.01
PE(40:4)	0.315	0.014
PE(18:0/22:5)	0.388	0.002
PE(18:1/22:4)	-0.151	0.249
PE(18:1/22:6)	0.26	0.045
PI(16:0/18:1)	0.363	0.004
PI(16:0/18:2)	0.311	0.016
PI(16:0/20:3)	0.292	0.024
PI(18:1/18:2)	0.448	0.000327
PI(18:1/20:4)	0.231	0.075
PI(16:0/22:6)	0.329	0.01
GlcCer(d18:1/24:1)	0.387	0.002
LysoPC(14:0)	0.235	0.07
LysoPC(16:1)	0.487	8e-05
LysoPC(18:3)	0.147	0.262
SM(d40:3)	0.304	0.018
TG(16:0/14:0/16:0)	0.161	0.22
TG(16:0/14:0/16:1)	0.231	0.076
TG(14:0/14:0/18:2)+TG(16:1/14:0/16:1)	0.199	0.127
TG(10:0/18:1/18:2)	0.181	0.165
TG(16:0/16:0/16:0)	0.167	0.202
TG(16:0/14:0/18:1)	0.233	0.073
TG(16:1/14:0/18:1)+TG(16:0/14:0/18:2)	0.214	0.101
TG(16:0/14:0/18:3)	0.122	0.354
TG(16:1/14:0/18:2)	0.161	0.218
TG(12:0/18:1/18:3)+TG(12:0/18:2/18:2)	0.073	0.582
TG(12:0/18:2/18:3)	0.089	0.498
TG(18:0/16:0/16:0)	0.102	0.438
TG(16:0/16:0/18:1)	0.266	0.04
TG(16:0/16:0/18:2)	0.15	0.253
TG(16:0/16:1/18:1)	0.297	0.021
TG(16:0/16:0/18:3)	0.135	0.305
TG(16:1/16:1/18:1)	0.109	0.408
TG(16:0/16:1/18:3)+TG(18:2/14:0/18:2)	0.011	0.933
TG(14:0/18:2/18:3)mixture	0.023	0.863
TG(18:3/14:0/18:3)mixture	0.003	0.981
TG(18:0/16:0/18:1)	0.145	0.271
TG(16:0/16:0/20:4)	0.064	0.629
TG(16:0/16:0/20:5)	0.057	0.667
TG(16:0/18:3/18:3)	-0.059	0.657
TG(16:0/18:1/20:4)	0.069	0.602
TG(16:0/18:2/20:4)	-0.082	0.533
TG(18:0/18:1/20:3)	0.313	0.015
TG(18:1/18:1/20:3)	0.178	0.173
TG(22:1/18:2/18:2)+TG(18:0/18:1/22:4)	0.414	0.001
TG(18:1/18:1/22:4)+TG(18:0/18:1/22:5)	0.243	0.061
TG(18:1/18:1/22:5)mixture	0.148	0.26
TG(24:1/18:2/18:2)	0.445	0.000367
TG(22:4/18:2/22:4)	0.2	0.125
TG(24:1/18:2/20:4)	0.52	2.1e-05

## Sheet: TP
Lipids	TP Correlation Coefficient	P-value
Cer(d18:1/18:0)	0.159	0.225
Cer(d18:0/24:1)	-0.037	0.776
Cer(d18:1/24:1)	-0.059	0.655
ChE(20:3)	0.247	0.057
ChE(22:5n6)	0.09	0.494
DG(16:0/18:1)	-0.052	0.693
DG(16:0/18:2)	-0.041	0.757
DG(16:1/18:1)	-0.055	0.675
DG(16:1/18:2)	-0.056	0.671
DG(16:0/20:4)	0.061	0.641
DG(20:1/18:1)	-0.089	0.498
DG(18:0/20:3)1	-0.085	0.518
DG(18:0/20:4)	0.172	0.19
DG(18:1/20:3)	0.076	0.563
DG(18:1/20:4)	0.119	0.364
DG(18:3/20:2)	0.049	0.712
DG(16:0/22:6)	0.091	0.488
DG(18:1/22:5)	-0.014	0.915
PC(14:0/14:0)	0.05	0.706
PC(16:0/14:0)	0.063	0.631
PC(16:1/14:0)	0.08	0.543
PC(17:1/14:0)	0.062	0.636
PC(16:0/16:0)	0.05	0.704
PC(16:0e/16:0)	-0.027	0.837
PC(16:0/16:1)	0.076	0.564
PC(14:0/18:2)	0.058	0.658
PC(14:0/18:3)	0.098	0.455
PC(15:0/18:1)	0.07	0.593
PC(18:0/16:0)	0.066	0.614
PC(16:0/18:1)	0.13	0.321
PC(18:1e/16:0)	0.02	0.88
PC(16:0/18:3)+PC(16:1/18:2)	0.109	0.408
PC(16:1/18:3)+PC(14:0/20:4)	0.126	0.338
PC(17:1/18:3)	-0.025	0.851
PC(18:0/18:1)	0.126	0.337
PC(18:1/18:1)	-0.029	0.828
PC(16:0/20:3)+PC(18:0/18:3)	0.159	0.226
PC(18:1/18:2)	-0.088	0.504
PC(18:2/18:2)	0.059	0.655
PC(16:1/20:4)	0.09	0.496
PC(18:2/18:3)	-0.091	0.49
PC(18:3/18:3)	0.137	0.298
PC(37:3)	0.079	0.548
PC(18:0/20:2)mixture	0.1	0.449
PC(18:0/20:3)	0.218	0.095
PC(18:1/20:2)	0.216	0.097
PC(16:0/22:4)	0.138	0.294
PC(16:0e/22:4)	0.168	0.199
PC(18:2/20:4)	0.114	0.384
PC(18:0/22:4)	0.191	0.143
PC(42:2)	0.054	0.681
PC(20:0/22:5)	0.009	0.946
PC(20:1/22:5)	0.072	0.583
PC(42:7)	-0.055	0.674
PC(22:5/22:6)	-0.128	0.33
PE(16:0/18:1)	0.044	0.737
PE(16:0/18:2)	0.045	0.735
PE(18:0/18:1)	0.005	0.971
PE(18:0/18:2)	0.009	0.943
PE(18:1/18:1)	-0.074	0.574
PE(18:1/18:2)	-0.048	0.713
PE(16:0/20:4)	0.027	0.836
PE(18:1/18:3)+PE(18:2/18:2)	-0.127	0.334
PE(16:1/20:4)	0.136	0.301
PE(18:0/20:3)	0.117	0.372
PE(18:0/20:5)	0.043	0.744
PE(40:4)	0.105	0.422
PE(18:0/22:5)	0.056	0.669
PE(18:1/22:4)	-0.022	0.869
PE(18:1/22:6)	-0.013	0.92
PI(16:0/18:1)	0.038	0.772
PI(16:0/18:2)	0.05	0.707
PI(16:0/20:3)	0.108	0.41
PI(18:1/18:2)	-0.072	0.585
PI(18:1/20:4)	0.062	0.637
PI(16:0/22:6)	0.051	0.698
GlcCer(d18:1/24:1)	-0.121	0.357
LysoPC(14:0)	0.079	0.548
LysoPC(16:1)	0.108	0.411
LysoPC(18:3)	0.022	0.866
SM(d40:3)	-0.116	0.377
TG(16:0/14:0/16:0)	-0.011	0.934
TG(16:0/14:0/16:1)	0.003	0.983
TG(14:0/14:0/18:2)+TG(16:1/14:0/16:1)	0.008	0.952
TG(10:0/18:1/18:2)	-0.067	0.613
TG(16:0/16:0/16:0)	0.028	0.833
TG(16:0/14:0/18:1)	0.014	0.916
TG(16:1/14:0/18:1)+TG(16:0/14:0/18:2)	0.004	0.978
TG(16:0/14:0/18:3)	0.024	0.857
TG(16:1/14:0/18:2)	-0.033	0.802
TG(12:0/18:1/18:3)+TG(12:0/18:2/18:2)	0.014	0.918
TG(12:0/18:2/18:3)	0.038	0.77
TG(18:0/16:0/16:0)	0.046	0.727
TG(16:0/16:0/18:1)	0.03	0.82
TG(16:0/16:0/18:2)	0.08	0.545
TG(16:0/16:1/18:1)	0.018	0.889
TG(16:0/16:0/18:3)	0.119	0.365
TG(16:1/16:1/18:1)	0.032	0.805
TG(16:0/16:1/18:3)+TG(18:2/14:0/18:2)	0.023	0.862
TG(14:0/18:2/18:3)mixture	0.038	0.774
TG(18:3/14:0/18:3)mixture	0.061	0.641
TG(18:0/16:0/18:1)	0.027	0.835
TG(16:0/16:0/20:4)	0.156	0.235
TG(16:0/16:0/20:5)	0.117	0.373
TG(16:0/18:3/18:3)	0.048	0.716
TG(16:0/18:1/20:4)	0.145	0.27
TG(16:0/18:2/20:4)	0.098	0.458
TG(18:0/18:1/20:3)	0.115	0.381
TG(18:1/18:1/20:3)	0.102	0.439
TG(22:1/18:2/18:2)+TG(18:0/18:1/22:4)	0.013	0.922
TG(18:1/18:1/22:4)+TG(18:0/18:1/22:5)	0.004	0.977
TG(18:1/18:1/22:5)mixture	-0.05	0.702
TG(24:1/18:2/18:2)	-0.093	0.481
TG(22:4/18:2/22:4)	-0.053	0.687
TG(24:1/18:2/20:4)	-0.035	0.791

## Sheet: ALB
Lipids	ALB Correlation Coefficient	P-value
Cer(d18:1/18:0)	-0.216	0.098
Cer(d18:0/24:1)	-0.401	0.001
Cer(d18:1/24:1)	-0.178	0.174
ChE(20:3)	0.19	0.145
ChE(22:5n6)	0.063	0.634
DG(16:0/18:1)	-0.198	0.13
DG(16:0/18:2)	-0.029	0.824
DG(16:1/18:1)	-0.343	0.007
DG(16:1/18:2)	-0.029	0.825
DG(16:0/20:4)	-0.113	0.392
DG(20:1/18:1)	-0.078	0.556
DG(18:0/20:3)1	0.024	0.856
DG(18:0/20:4)	0.078	0.554
DG(18:1/20:3)	-0.003	0.981
DG(18:1/20:4)	0.031	0.812
DG(18:3/20:2)	0.092	0.486
DG(16:0/22:6)	0.272	0.036
DG(18:1/22:5)	0.134	0.307
PC(14:0/14:0)	-0.472	0.000142
PC(16:0/14:0)	-0.565	3e-06
PC(16:1/14:0)	-0.542	8e-06
PC(17:1/14:0)	-0.51	3.1e-05
PC(16:0/16:0)	-0.476	0.000123
PC(16:0e/16:0)	-0.434	0.001
PC(16:0/16:1)	-0.567	2e-06
PC(14:0/18:2)	-0.293	0.023
PC(14:0/18:3)	-0.351	0.006
PC(15:0/18:1)	-0.414	0.001
PC(18:0/16:0)	-0.204	0.119
PC(16:0/18:1)	-0.332	0.01
PC(18:1e/16:0)	-0.376	0.003
PC(16:0/18:3)+PC(16:1/18:2)	-0.274	0.034
PC(16:1/18:3)+PC(14:0/20:4)	-0.111	0.401
PC(17:1/18:3)	0.038	0.772
PC(18:0/18:1)	-0.242	0.063
PC(18:1/18:1)	-0.331	0.01
PC(16:0/20:3)+PC(18:0/18:3)	-0.145	0.268
PC(18:1/18:2)	-0.299	0.02
PC(18:2/18:2)	-0.191	0.143
PC(16:1/20:4)	-0.156	0.235
PC(18:2/18:3)	-0.112	0.393
PC(18:3/18:3)	0.048	0.718
PC(37:3)	0.042	0.75
PC(18:0/20:2)mixture	-0.189	0.148
PC(18:0/20:3)	0.002	0.986
PC(18:1/20:2)	0.002	0.99
PC(16:0/22:4)	-0.239	0.066
PC(16:0e/22:4)	-0.275	0.033
PC(18:2/20:4)	-0.056	0.673
PC(18:0/22:4)	-0.08	0.544
PC(42:2)	-0.402	0.001
PC(20:0/22:5)	-0.122	0.355
PC(20:1/22:5)	-0.013	0.924
PC(42:7)	0.019	0.886
PC(22:5/22:6)	-0.225	0.084
PE(16:0/18:1)	-0.4	0.002
PE(16:0/18:2)	-0.384	0.002
PE(18:0/18:1)	-0.323	0.012
PE(18:0/18:2)	-0.295	0.022
PE(18:1/18:1)	-0.349	0.006
PE(18:1/18:2)	-0.346	0.007
PE(16:0/20:4)	-0.224	0.085
PE(18:1/18:3)+PE(18:2/18:2)	-0.332	0.01
PE(16:1/20:4)	-0.288	0.026
PE(18:0/20:3)	-0.239	0.066
PE(18:0/20:5)	-0.28	0.03
PE(40:4)	-0.28	0.03
PE(18:0/22:5)	-0.362	0.004
PE(18:1/22:4)	0.093	0.478
PE(18:1/22:6)	-0.144	0.271
PI(16:0/18:1)	-0.417	0.001
PI(16:0/18:2)	-0.347	0.007
PI(16:0/20:3)	-0.32	0.013
PI(18:1/18:2)	-0.315	0.014
PI(18:1/20:4)	-0.256	0.048
PI(16:0/22:6)	-0.278	0.032
GlcCer(d18:1/24:1)	-0.442	0.000407
LysoPC(14:0)	-0.141	0.281
LysoPC(16:1)	-0.18	0.169
LysoPC(18:3)	-0.068	0.604
SM(d40:3)	-0.141	0.281
TG(16:0/14:0/16:0)	-0.348	0.006
TG(16:0/14:0/16:1)	-0.359	0.005
TG(14:0/14:0/18:2)+TG(16:1/14:0/16:1)	-0.311	0.016
TG(10:0/18:1/18:2)	-0.264	0.042
TG(16:0/16:0/16:0)	-0.337	0.008
TG(16:0/14:0/18:1)	-0.355	0.005
TG(16:1/14:0/18:1)+TG(16:0/14:0/18:2)	-0.319	0.013
TG(16:0/14:0/18:3)	-0.149	0.257
TG(16:1/14:0/18:2)	-0.255	0.049
TG(12:0/18:1/18:3)+TG(12:0/18:2/18:2)	-0.088	0.505
TG(12:0/18:2/18:3)	-0.08	0.541
TG(18:0/16:0/16:0)	-0.192	0.143
TG(16:0/16:0/18:1)	-0.328	0.011
TG(16:0/16:0/18:2)	-0.191	0.143
TG(16:0/16:1/18:1)	-0.325	0.011
TG(16:0/16:0/18:3)	-0.138	0.294
TG(16:1/16:1/18:1)	-0.135	0.305
TG(16:0/16:1/18:3)+TG(18:2/14:0/18:2)	-0.019	0.888
TG(14:0/18:2/18:3)mixture	-0.021	0.875
TG(18:3/14:0/18:3)mixture	-0.038	0.775
TG(18:0/16:0/18:1)	-0.167	0.201
TG(16:0/16:0/20:4)	-0.054	0.681
TG(16:0/16:0/20:5)	-0.1	0.445
TG(16:0/18:3/18:3)	0.066	0.619
TG(16:0/18:1/20:4)	-0.02	0.877
TG(16:0/18:2/20:4)	0.067	0.611
TG(18:0/18:1/20:3)	-0.036	0.786
TG(18:1/18:1/20:3)	-0.039	0.768
TG(22:1/18:2/18:2)+TG(18:0/18:1/22:4)	-0.119	0.365
TG(18:1/18:1/22:4)+TG(18:0/18:1/22:5)	-0.025	0.848
TG(18:1/18:1/22:5)mixture	0.045	0.733
TG(24:1/18:2/18:2)	-0.151	0.25
TG(22:4/18:2/22:4)	-0.142	0.28
TG(24:1/18:2/20:4)	-0.292	0.023

## Sheet: DBIL
Lipids	DBIL Correlation Coefficient	P-value
Cer(d18:1/18:0)	0.264	0.042
Cer(d18:0/24:1)	0.514	2.6e-05
Cer(d18:1/24:1)	0.227	0.082
ChE(20:3)	-0.121	0.355
ChE(22:5n6)	-0.077	0.558
DG(16:0/18:1)	0.189	0.148
DG(16:0/18:2)	0.054	0.682
DG(16:1/18:1)	0.239	0.066
DG(16:1/18:2)	0.022	0.869
DG(16:0/20:4)	0.123	0.348
DG(20:1/18:1)	0.162	0.217
DG(18:0/20:3)1	0.115	0.381
DG(18:0/20:4)	-0.012	0.93
DG(18:1/20:3)	0.104	0.429
DG(18:1/20:4)	0.102	0.437
DG(18:3/20:2)	0.047	0.722
DG(16:0/22:6)	-0.137	0.297
DG(18:1/22:5)	0.001	0.994
PC(14:0/14:0)	0.302	0.019
PC(16:0/14:0)	0.465	0.000179
PC(16:1/14:0)	0.433	0.001
PC(17:1/14:0)	0.442	0.000409
PC(16:0/16:0)	0.647	2.2959e-08
PC(16:0e/16:0)	0.512	2.9e-05
PC(16:0/16:1)	0.496	5.6e-05
PC(14:0/18:2)	0.271	0.036
PC(14:0/18:3)	0.251	0.053
PC(15:0/18:1)	0.431	0.001
PC(18:0/16:0)	0.296	0.021
PC(16:0/18:1)	0.517	2.3e-05
PC(18:1e/16:0)	0.554	4e-06
PC(16:0/18:3)+PC(16:1/18:2)	0.257	0.048
PC(16:1/18:3)+PC(14:0/20:4)	0.029	0.828
PC(17:1/18:3)	0.11	0.402
PC(18:0/18:1)	0.289	0.025
PC(18:1/18:1)	0.54	9e-06
PC(16:0/20:3)+PC(18:0/18:3)	0.3	0.02
PC(18:1/18:2)	0.464	0.000188
PC(18:2/18:2)	0.245	0.059
PC(16:1/20:4)	0.253	0.051
PC(18:2/18:3)	0.212	0.104
PC(18:3/18:3)	0.027	0.841
PC(37:3)	0.118	0.368
PC(18:0/20:2)mixture	0.267	0.039
PC(18:0/20:3)	0.139	0.289
PC(18:1/20:2)	0.136	0.3
PC(16:0/22:4)	0.205	0.116
PC(16:0e/22:4)	0.388	0.002
PC(18:2/20:4)	0.111	0.4
PC(18:0/22:4)	0.041	0.754
PC(42:2)	0.57	2e-06
PC(20:0/22:5)	0.354	0.005
PC(20:1/22:5)	0.183	0.163
PC(42:7)	0.353	0.006
PC(22:5/22:6)	0.161	0.218
PE(16:0/18:1)	0.307	0.017
PE(16:0/18:2)	0.188	0.15
PE(18:0/18:1)	0.23	0.077
PE(18:0/18:2)	0.082	0.535
PE(18:1/18:1)	0.413	0.001
PE(18:1/18:2)	0.305	0.018
PE(16:0/20:4)	0.066	0.616
PE(18:1/18:3)+PE(18:2/18:2)	0.076	0.561
PE(16:1/20:4)	0.008	0.954
PE(18:0/20:3)	0.169	0.198
PE(18:0/20:5)	0.143	0.277
PE(40:4)	0.147	0.263
PE(18:0/22:5)	0.151	0.25
PE(18:1/22:4)	-0.224	0.085
PE(18:1/22:6)	0.183	0.162
PI(16:0/18:1)	0.236	0.069
PI(16:0/18:2)	0.194	0.137
PI(16:0/20:3)	0.179	0.172
PI(18:1/18:2)	0.263	0.042
PI(18:1/20:4)	0.124	0.344
PI(16:0/22:6)	0.254	0.05
GlcCer(d18:1/24:1)	0.445	0.000367
LysoPC(14:0)	0.137	0.296
LysoPC(16:1)	0.438	0.00046
LysoPC(18:3)	0.074	0.576
SM(d40:3)	0.258	0.046
TG(16:0/14:0/16:0)	0.046	0.725
TG(16:0/14:0/16:1)	0.066	0.614
TG(14:0/14:0/18:2)+TG(16:1/14:0/16:1)	0.044	0.739
TG(10:0/18:1/18:2)	0.039	0.766
TG(16:0/16:0/16:0)	0.039	0.764
TG(16:0/14:0/18:1)	0.102	0.437
TG(16:1/14:0/18:1)+TG(16:0/14:0/18:2)	0.06	0.649
TG(16:0/14:0/18:3)	-0.024	0.853
TG(16:1/14:0/18:2)	0.038	0.772
TG(12:0/18:1/18:3)+TG(12:0/18:2/18:2)	-0.047	0.721
TG(12:0/18:2/18:3)	-0.027	0.838
TG(18:0/16:0/16:0)	-0.02	0.881
TG(16:0/16:0/18:1)	0.149	0.257
TG(16:0/16:0/18:2)	0.059	0.653
TG(16:0/16:1/18:1)	0.141	0.282
TG(16:0/16:0/18:3)	0.037	0.776
TG(16:1/16:1/18:1)	-0.002	0.986
TG(16:0/16:1/18:3)+TG(18:2/14:0/18:2)	-0.065	0.624
TG(14:0/18:2/18:3)mixture	-0.044	0.736
TG(18:3/14:0/18:3)mixture	-0.057	0.665
TG(18:0/16:0/18:1)	-0.022	0.869
TG(16:0/16:0/20:4)	0.009	0.943
TG(16:0/16:0/20:5)	-0.044	0.739
TG(16:0/18:3/18:3)	-0.12	0.36
TG(16:0/18:1/20:4)	0.024	0.857
TG(16:0/18:2/20:4)	-0.117	0.374
TG(18:0/18:1/20:3)	0.155	0.237
TG(18:1/18:1/20:3)	0.074	0.576
TG(22:1/18:2/18:2)+TG(18:0/18:1/22:4)	0.315	0.014
TG(18:1/18:1/22:4)+TG(18:0/18:1/22:5)	0.196	0.134
TG(18:1/18:1/22:5)mixture	0.115	0.382
TG(24:1/18:2/18:2)	0.356	0.005
TG(22:4/18:2/22:4)	0.24	0.065
TG(24:1/18:2/20:4)	0.487	7.9e-05

## Sheet: ALT
Lipids	ALT Correlation Coefficient	P-value
Cer(d18:1/18:0)	0.637	4.5885e-08
Cer(d18:0/24:1)	0.38	0.003
Cer(d18:1/24:1)	0.36	0.005
ChE(20:3)	0.184	0.159
ChE(22:5n6)	0.013	0.92
DG(16:0/18:1)	0.253	0.051
DG(16:0/18:2)	0.352	0.006
DG(16:1/18:1)	0.184	0.16
DG(16:1/18:2)	0.207	0.112
DG(16:0/20:4)	0.261	0.044
DG(20:1/18:1)	0.223	0.086
DG(18:0/20:3)1	0.339	0.008
DG(18:0/20:4)	0.257	0.047
DG(18:1/20:3)	0.365	0.004
DG(18:1/20:4)	0.309	0.016
DG(18:3/20:2)	0.324	0.011
DG(16:0/22:6)	0.171	0.192
DG(18:1/22:5)	0.275	0.033
PC(14:0/14:0)	0.215	0.099
PC(16:0/14:0)	0.312	0.015
PC(16:1/14:0)	0.249	0.055
PC(17:1/14:0)	0.329	0.01
PC(16:0/16:0)	0.403	0.001
PC(16:0e/16:0)	0.38	0.003
PC(16:0/16:1)	0.311	0.015
PC(14:0/18:2)	0.34	0.008
PC(14:0/18:3)	0.259	0.046
PC(15:0/18:1)	0.344	0.007
PC(18:0/16:0)	0.389	0.002
PC(16:0/18:1)	0.415	0.001
PC(18:1e/16:0)	0.347	0.007
PC(16:0/18:3)+PC(16:1/18:2)	0.182	0.165
PC(16:1/18:3)+PC(14:0/20:4)	0.263	0.043
PC(17:1/18:3)	0.261	0.044
PC(18:0/18:1)	0.317	0.013
PC(18:1/18:1)	0.388	0.002
PC(16:0/20:3)+PC(18:0/18:3)	0.422	0.001
PC(18:1/18:2)	0.306	0.017
PC(18:2/18:2)	0.343	0.007
PC(16:1/20:4)	0.346	0.007
PC(18:2/18:3)	0.262	0.044
PC(18:3/18:3)	0.222	0.089
PC(37:3)	0.292	0.024
PC(18:0/20:2)mixture	0.384	0.002
PC(18:0/20:3)	0.368	0.004
PC(18:1/20:2)	0.375	0.003
PC(16:0/22:4)	0.321	0.012
PC(16:0e/22:4)	0.318	0.013
PC(18:2/20:4)	0.302	0.019
PC(18:0/22:4)	0.141	0.284
PC(42:2)	0.189	0.148
PC(20:0/22:5)	0.186	0.155
PC(20:1/22:5)	0.124	0.344
PC(42:7)	0.123	0.347
PC(22:5/22:6)	-0.094	0.475
PE(16:0/18:1)	0.171	0.192
PE(16:0/18:2)	0.169	0.196
PE(18:0/18:1)	0.087	0.51
PE(18:0/18:2)	0.134	0.309
PE(18:1/18:1)	0.122	0.355
PE(18:1/18:2)	0.124	0.346
PE(16:0/20:4)	0.039	0.767
PE(18:1/18:3)+PE(18:2/18:2)	0.007	0.958
PE(16:1/20:4)	-0.052	0.696
PE(18:0/20:3)	0.355	0.005
PE(18:0/20:5)	0.179	0.172
PE(40:4)	0.293	0.023
PE(18:0/22:5)	0.279	0.031
PE(18:1/22:4)	0.016	0.901
PE(18:1/22:6)	0.186	0.154
PI(16:0/18:1)	-0.074	0.573
PI(16:0/18:2)	0.032	0.807
PI(16:0/20:3)	0.036	0.786
PI(18:1/18:2)	0.087	0.509
PI(18:1/20:4)	0.054	0.683
PI(16:0/22:6)	0.063	0.632
GlcCer(d18:1/24:1)	0.263	0.043
LysoPC(14:0)	0.4	0.002
LysoPC(16:1)	0.525	1.7e-05
LysoPC(18:3)	0.244	0.06
SM(d40:3)	0.248	0.057
TG(16:0/14:0/16:0)	0.064	0.629
TG(16:0/14:0/16:1)	0.067	0.61
TG(14:0/14:0/18:2)+TG(16:1/14:0/16:1)	0.098	0.456
TG(10:0/18:1/18:2)	0.131	0.317
TG(16:0/16:0/16:0)	0.089	0.498
TG(16:0/14:0/18:1)	0.068	0.603
TG(16:1/14:0/18:1)+TG(16:0/14:0/18:2)	0.078	0.554
TG(16:0/14:0/18:3)	0.116	0.377
TG(16:1/14:0/18:2)	0.11	0.402
TG(12:0/18:1/18:3)+TG(12:0/18:2/18:2)	0.134	0.306
TG(12:0/18:2/18:3)	0.094	0.476
TG(18:0/16:0/16:0)	0.086	0.516
TG(16:0/16:0/18:1)	0.154	0.239
TG(16:0/16:0/18:2)	0.206	0.115
TG(16:0/16:1/18:1)	0.055	0.677
TG(16:0/16:0/18:3)	0.14	0.287
TG(16:1/16:1/18:1)	0.133	0.31
TG(16:0/16:1/18:3)+TG(18:2/14:0/18:2)	0.143	0.277
TG(14:0/18:2/18:3)mixture	0.11	0.404
TG(18:3/14:0/18:3)mixture	0.067	0.609
TG(18:0/16:0/18:1)	0.125	0.341
TG(16:0/16:0/20:4)	0.105	0.423
TG(16:0/16:0/20:5)	0.06	0.649
TG(16:0/18:3/18:3)	0.066	0.614
TG(16:0/18:1/20:4)	0.213	0.103
TG(16:0/18:2/20:4)	0.119	0.365
TG(18:0/18:1/20:3)	0.341	0.008
TG(18:1/18:1/20:3)	0.279	0.031
TG(22:1/18:2/18:2)+TG(18:0/18:1/22:4)	0.338	0.008
TG(18:1/18:1/22:4)+TG(18:0/18:1/22:5)	0.301	0.019
TG(18:1/18:1/22:5)mixture	0.183	0.161
TG(24:1/18:2/18:2)	0.212	0.104
TG(22:4/18:2/22:4)	0.097	0.461
TG(24:1/18:2/20:4)	0.229	0.078

## Sheet: IgG
Lipids	IgG Correlation Coefficient	P-value
Cer(d18:1/18:0)	0.167	0.219
Cer(d18:0/24:1)	-0.095	0.485
Cer(d18:1/24:1)	-0.139	0.307
ChE(20:3)	0.108	0.43
ChE(22:5n6)	0.091	0.506
DG(16:0/18:1)	0.051	0.707
DG(16:0/18:2)	-0.055	0.688
DG(16:1/18:1)	0.021	0.878
DG(16:1/18:2)	-0.095	0.486
DG(16:0/20:4)	0.118	0.387
DG(20:1/18:1)	-0.118	0.386
DG(18:0/20:3)1	-0.186	0.171
DG(18:0/20:4)	0.053	0.698
DG(18:1/20:3)	-0.077	0.573
DG(18:1/20:4)	-0.023	0.865
DG(18:3/20:2)	-0.106	0.435
DG(16:0/22:6)	-0.049	0.719
DG(18:1/22:5)	-0.174	0.201
PC(14:0/14:0)	0.122	0.371
PC(16:0/14:0)	0.163	0.231
PC(16:1/14:0)	0.12	0.379
PC(17:1/14:0)	0.109	0.422
PC(16:0/16:0)	0.125	0.36
PC(16:0e/16:0)	0.107	0.433
PC(16:0/16:1)	0.124	0.364
PC(14:0/18:2)	0.009	0.946
PC(14:0/18:3)	0.055	0.689
PC(15:0/18:1)	0.05	0.715
PC(18:0/16:0)	0.094	0.49
PC(16:0/18:1)	0.061	0.656
PC(18:1e/16:0)	0.094	0.49
PC(16:0/18:3)+PC(16:1/18:2)	0.066	0.631
PC(16:1/18:3)+PC(14:0/20:4)	0.058	0.672
PC(17:1/18:3)	-0.051	0.71
PC(18:0/18:1)	0.043	0.752
PC(18:1/18:1)	-0.042	0.756
PC(16:0/20:3)+PC(18:0/18:3)	0.034	0.804
PC(18:1/18:2)	-0.071	0.602
PC(18:2/18:2)	-0.027	0.846
PC(16:1/20:4)	0.076	0.578
PC(18:2/18:3)	-0.215	0.112
PC(18:3/18:3)	0.033	0.812
PC(37:3)	-0.032	0.813
PC(18:0/20:2)mixture	0.025	0.853
PC(18:0/20:3)	0.064	0.638
PC(18:1/20:2)	0.065	0.635
PC(16:0/22:4)	0.05	0.712
PC(16:0e/22:4)	0.228	0.092
PC(18:2/20:4)	0.056	0.682
PC(18:0/22:4)	0.119	0.38
PC(42:2)	0.051	0.707
PC(20:0/22:5)	-0.147	0.278
PC(20:1/22:5)	-0.151	0.268
PC(42:7)	-0.163	0.229
PC(22:5/22:6)	-0.263	0.05
PE(16:0/18:1)	0.071	0.601
PE(16:0/18:2)	0.063	0.645
PE(18:0/18:1)	0	0.998
PE(18:0/18:2)	-0.039	0.773
PE(18:1/18:1)	-0.068	0.619
PE(18:1/18:2)	-0.039	0.778
PE(16:0/20:4)	-0.014	0.919
PE(18:1/18:3)+PE(18:2/18:2)	-0.104	0.447
PE(16:1/20:4)	0.159	0.243
PE(18:0/20:3)	0.025	0.855
PE(18:0/20:5)	0.036	0.795
PE(40:4)	0.058	0.669
PE(18:0/22:5)	0.118	0.385
PE(18:1/22:4)	-0.183	0.177
PE(18:1/22:6)	-0.094	0.489
PI(16:0/18:1)	0.018	0.897
PI(16:0/18:2)	0.003	0.982
PI(16:0/20:3)	0.047	0.728
PI(18:1/18:2)	-0.087	0.521
PI(18:1/20:4)	0.011	0.936
PI(16:0/22:6)	0.062	0.65
GlcCer(d18:1/24:1)	-0.132	0.333
LysoPC(14:0)	0.101	0.458
LysoPC(16:1)	0.1	0.465
LysoPC(18:3)	-0.085	0.534
SM(d40:3)	-0.057	0.677
TG(16:0/14:0/16:0)	0.09	0.509
TG(16:0/14:0/16:1)	0.103	0.451
TG(14:0/14:0/18:2)+TG(16:1/14:0/16:1)	0.087	0.523
TG(10:0/18:1/18:2)	0.005	0.97
TG(16:0/16:0/16:0)	0.162	0.232
TG(16:0/14:0/18:1)	0.107	0.434
TG(16:1/14:0/18:1)+TG(16:0/14:0/18:2)	0.097	0.479
TG(16:0/14:0/18:3)	0.02	0.886
TG(16:1/14:0/18:2)	0.023	0.864
TG(12:0/18:1/18:3)+TG(12:0/18:2/18:2)	-0.022	0.871
TG(12:0/18:2/18:3)	-0.015	0.911
TG(18:0/16:0/16:0)	0.113	0.408
TG(16:0/16:0/18:1)	0.132	0.333
TG(16:0/16:0/18:2)	0.164	0.228
TG(16:0/16:1/18:1)	0.046	0.739
TG(16:0/16:0/18:3)	0.089	0.515
TG(16:1/16:1/18:1)	0.034	0.801
TG(16:0/16:1/18:3)+TG(18:2/14:0/18:2)	-0.038	0.782
TG(14:0/18:2/18:3)mixture	-0.063	0.644
TG(18:3/14:0/18:3)mixture	-0.045	0.741
TG(18:0/16:0/18:1)	0.046	0.736
TG(16:0/16:0/20:4)	0.124	0.361
TG(16:0/16:0/20:5)	0.064	0.637
TG(16:0/18:3/18:3)	-0.123	0.367
TG(16:0/18:1/20:4)	-0.018	0.895
TG(16:0/18:2/20:4)	-0.047	0.731
TG(18:0/18:1/20:3)	-0.044	0.745
TG(18:1/18:1/20:3)	-0.086	0.53
TG(22:1/18:2/18:2)+TG(18:0/18:1/22:4)	-0.105	0.441
TG(18:1/18:1/22:4)+TG(18:0/18:1/22:5)	-0.164	0.227
TG(18:1/18:1/22:5)mixture	-0.26	0.053
TG(24:1/18:2/18:2)	-0.104	0.444
TG(22:4/18:2/22:4)	-0.237	0.079
TG(24:1/18:2/20:4)	-0.128	0.349

[truncated: 3 more sheets: IgA, IgM, Description]
